# Supplementary material for: Quantitative Detection of Shiga Toxins Directly from Stool Specimens of Patients Associated with an Outbreak of Enterohemorrhagic Escherichia coli in Japan—Quantitative Shiga toxin detection from stool during EHEC outbreak
Source: PubMed Central journal article supplement (PMC4626740; doi:10.3390/toxins7104381), 2015-10-27
Supplement: toxins-07-04381-s001.pdf [file toxins-07-04381-s001.pdf]

## Supplementary Materials

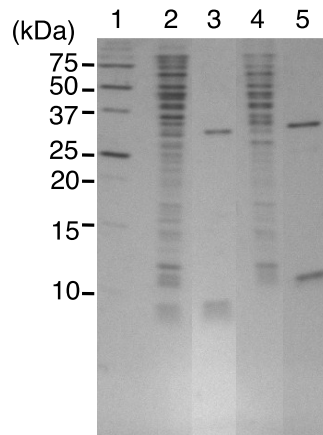

**Figure S1.** Purities of purified recombinant Stx1 and Stx2 proteins. Purity of purified recombinant Stx1 and Stx2 were examined by SDS-PAGE followed by silver staining. Purified preparations gave two stained bands correspond to A and B subunits of Stx proteins. 1: molecular weight maker; 2: whole cell lysate of *E. coli* strain YO-01 (pKTJ5-15x); 3: purified recombinant Stx1 (625 ng); 4: whole cell lysate of *E. coli* HB101 (pKTN817) strain; 5: purified recombinant Stx2 (625 ng).

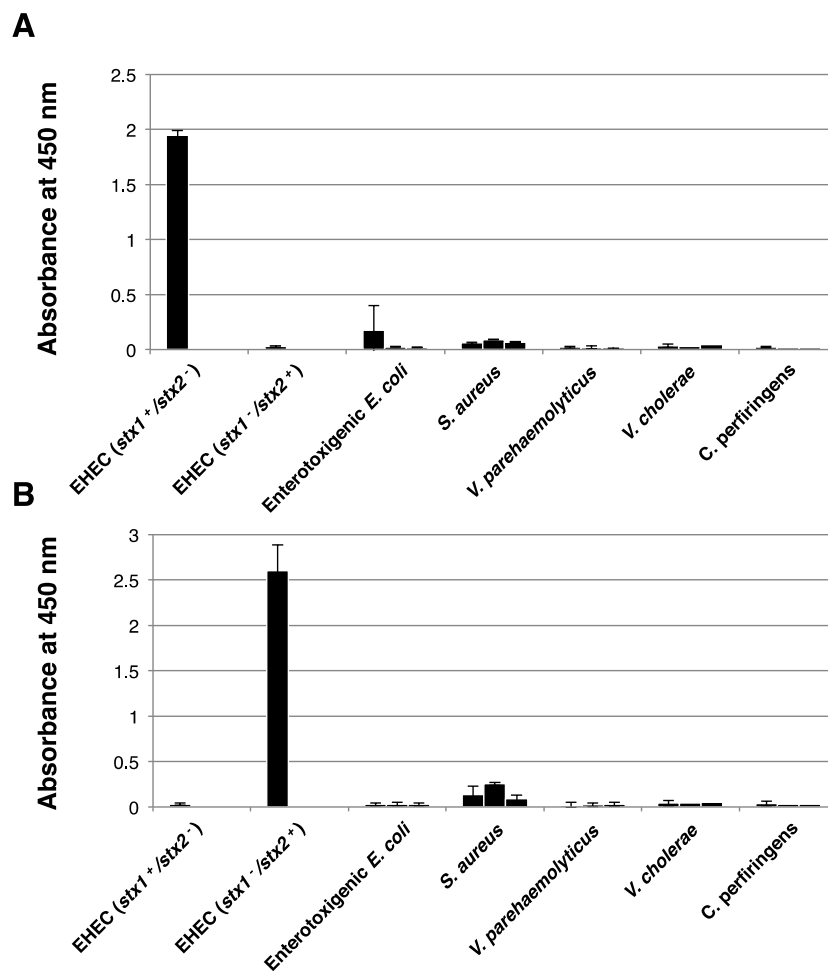

**Figure S2.** *Cont.*

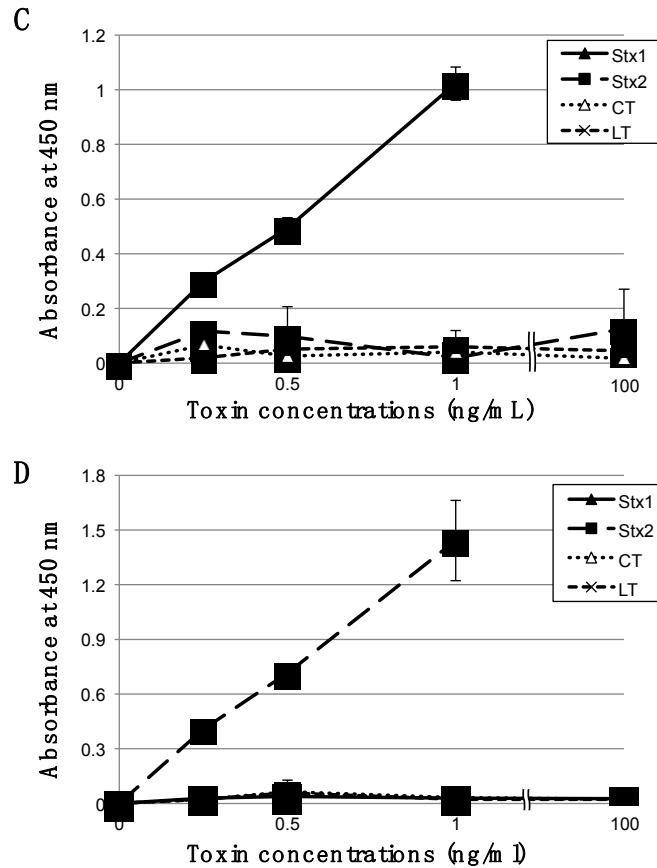

**Figure S2.** Specificities of bead-ELISA. (A,B) Various food-borne pathogens were examined by bead-ELISA specific for Stx1 (A) and Stx2 (B). Overnight cultures of EHEC (in CAYE broth), Enterotoxigenic *E. coli* (in CAYE broth), *S. aureus* (in BHI broth), *V. parahaemolyticus* (in Mannitol-salt peptone water), *V. cholerae* (in AKI broth) and *C. perfringens* (in Duncan-Strong Broth) were sonicated with maximum power of Handy Sonic UR-20P (TOMY SEIKO CO., LTD, Tokyo, Japan) for 45 s. Clear fractions obtained after centrifugation ( $12,000\times g$  for 10 min.) of sonicated cultures were analyzed by bead-ELISA. For Enterotoxigenic *E. coli*, *S. aureus*, *V. parahaemolyticus*, *V. cholerae* and *C. perfringens*, 3 independent isolates were analyzed, and each bars indicates the results for each independent isolates. Data are means  $\pm$  SD of values from three experiments. No nonspecific reactions were observed in all the experiments; (C,D): Purified AB<sub>5</sub> toxins were examined by bead-ELISA specific for Stx1 (C) and Stx2 (D). Various concentrations of purified recombinant Stx1, Stx2, cholera toxin (CT) and *E. coli* heat-labile enterotoxin (LT) were examined by bead-ELISA. Data are means  $\pm$  SD of values from three experiments. No nonspecific reactions were observed in all the experiments.
